# Supplementary material for: Mapping Hydrothermal Alteration at the Fentale-Dofan Magmatic Segment of the Main Ethiopian Rift
Source: Frontiers journal article supplement (doi:10.3389/feart.2021.716144), 2021-08-20
Supplement: Table_1.XLSX [file Table_1.XLSX]

## Sheet: hydrothermal_manifestations
OBJECTID	source	ref_name	latitude	longitude	feature	T	pH
1	Hunt et al., (2017)	Boku 1	8.46897	39.2756	warm ground/fumaroles
2	Hunt et al., (2017)	Boku 2	8.47555	39.2698	warm ground/fumaroles
3	Hunt et al., (2017)	ND 01	8.47336	39.1828	hot spring
4	Hunt et al., (2017)	ND 02	8.46233	39.1917	hot spring
5	Hunt et al., (2017)	ND 03	8.39604	39.3993	hot spring
6	Hunt et al., (2017)	ND 04	8.40443	39.3906	hot spring
7	Hunt et al., (2017)	ND 05	8.40372	39.3895	hot spring
8	Hunt et al., (2017)	Woliso	8.53204	37.9808	hot spring	30	7,8
9	Hunt et al., (2017)	Sodere	8.4004	39.3881	hot spring	50	7,4
10	Hunt et al., (2017)	Gergedi	8.4592	39.1935	hot spring	42
11	Hunt et al., (2017)	Wonji	8.47236	39.2045	hot spring	67	6,7
12	Hunt et al., (2017)	Meteka 1	9.97144	40.5398	hot spring		7,7
13	Hunt et al., (2017)	Meteka 2	9.96873	40.5398	hot spring	47	8,4
14	Hunt et al., (2017)	Allallobed	5.67801	43.7559	hot spring		8,4
15	Hunt et al., (2017)	TM01	8.17047	39.146	thermal vent
16	Hunt et al., (2017)	TM02	8.16859	39.1452	thermal vent
17	Hunt et al., (2017)	TM03	8.17041	39.146	thermal vent
18	Hunt et al., (2017)	TM04	8.1685	39.1452	thermal vent
19	Hunt et al., (2017)	TM05	8.16846	39.1452	thermal vent
20	Hunt et al., (2017)	TM06	8.16859	39.145	thermal vent
21	Hunt et al., (2017)	TM07	8.16848	39.145	thermal vent
22	Hunt et al., (2017)	TM08	8.16848	39.145	thermal vent
23	Hunt et al., (2017)	TM09	8.16834	39.145	thermal vent
24	Hunt et al., (2017)	TM10	8.16856	39.145	thermal vent
25	Hunt et al., (2017)	TM11	8.16883	39.1448	thermal vent
26	Hunt et al., (2017)	TM12	8.16885	39.2358	thermal vent
27	Hunt et al., (2017)	TM13	8.16888	39.1452	thermal vent
28	Hunt et al., (2017)	TM14	8.16883	39.1451	thermal vent
29	Hunt et al., (2017)	TM15	8.16885	39.1452	thermal vent
30	Hunt et al., (2017)	TM16	8.16869	39.1451	thermal vent
31	Hunt et al., (2017)	TM17	8.16808	39.1449	thermal vent
32	Hunt et al., (2017)	TM18	8.16573	39.1439	thermal vent
33	Hunt et al., (2017)	TM19	8.16382	39.1254	thermal vent
34	Hunt et al., (2017)	TM20	8.1638	39.1255	thermal vent
35	Hunt et al., (2017)	TM21	8.1638	39.1255	thermal vent
36	Hunt et al., (2017)	TM22	8.16437	39.1266	thermal vent
37	Hunt et al., (2017)	TM23	8.16464	39.1257	thermal vent
38	Hunt et al., (2017)	TM24	8.16464	39.1257	thermal vent
39	Hunt et al., (2017)	TM25	8.16481	39.1257	thermal vent
40	Hunt et al., (2017)	TM26	8.17803	39.1495	thermal vent
41	Hunt et al., (2017)	TM27	8.17806	39.1495	thermal vent
42	Hunt et al., (2017)	TM28	8.17807	39.1495	thermal vent
43	Hunt et al., (2017)	TM29	8.1781	39.1495	thermal vent
44	Hunt et al., (2017)	TM30	8.17814	39.1586	thermal vent
45	Hunt et al., (2017)	TM31	8.17818	39.1495	thermal vent
46	Hunt et al., (2017)	TM32	8.17814	39.1495	thermal vent
47	Hunt et al., (2017)	TM33	8.17812	39.1498	thermal vent
48	Hunt et al., (2017)	TM34	8.17813	39.1498	thermal vent
49	Hunt et al., (2017)	TM35	8.17812	39.1498	thermal vent
50	Hunt et al., (2017)	TM36	8.17824	39.1496	thermal vent
51	Hunt et al., (2017)	TM37	8.17826	39.1333	thermal vent
52	Hunt et al., (2017)	TM38	8.17834	39.1496	thermal vent
53	Hunt et al., (2017)	TM39	8.17832	39.1496	thermal vent
54	Hunt et al., (2017)	TM40	8.18373	39.1484	thermal vent
55	Hunt et al., (2017)	TM41	8.18186	39.1474	thermal vent
56	Hunt et al., (2017)	TM42	8.18185	39.1474	thermal vent
57	Hunt et al., (2017)	TM43	8.18183	39.1471	thermal vent
58	Hunt et al., (2017)	TM44	8.18186	39.1479	thermal vent
59	Hunt et al., (2017)	TM45	8.18192	39.1478	thermal vent
60	Hunt et al., (2017)	TM46	8.18201	39.1478	thermal vent
61	Hunt et al., (2017)	TM47	8.18162	39.1477	thermal vent
62	Hunt et al., (2017)	TM48	8.18164	39.1477	thermal vent
63	Hunt et al., (2017)	TM49	8.18164	39.1467	thermal vent
64	Hunt et al., (2017)	TM50	8.18244	39.1473	thermal vent
65	Hunt et al., (2017)	TM51	8.18189	39.1474	thermal vent
66	Hunt et al., (2017)	TM52	8.18192	39.1474	thermal vent
67	Hunt et al., (2017)	TM53	8.18203	39.1474	thermal vent
68	Hunt et al., (2017)	TM54	8.18207	39.1474	thermal vent
69	Hunt et al., (2017)	TM55	8.1821	39.1474	thermal vent
70	Hunt et al., (2017)	TM56	8.18204	39.1474	thermal vent
71	Hunt et al., (2017)	TM57	8.18253	39.1476	thermal vent
72	Hunt et al., (2017)	TM58	8.18223	39.1476	thermal vent
73	Hunt et al., (2017)	TM59	8.18224	39.1477	thermal vent
74	Hunt et al., (2017)	TM60	8.18227	39.1477	thermal vent
75	Hunt et al., (2017)	TM61	8.19614	39.1596	thermal vent
76	Hunt et al., (2017)	TM62	8.19613	39.1594	thermal vent
77	Hunt et al., (2017)	TM63	8.20262	39.1625	thermal vent
78	Hunt et al., (2017)	TM64	8.20284	39.1626	thermal vent
79	Hunt et al., (2017)	TM65	8.20267	39.1628	thermal vent
80	Hunt et al., (2017)	TM66	8.20269	39.1628	thermal vent
81	Hunt et al., (2017)	TM67	8.203	39.1622	thermal vent
82	Hunt et al., (2017)	TM68	8.20309	39.1622	thermal vent
83	Hunt et al., (2017)	TM69	8.26197	39.1551	thermal vent
84	Hunt et al., (2017)	TM70	8.31765	39.1866	thermal vent
85	Hunt et al., (2017)	Hubicha 01	8.85286	39.8342	hot spring
86	Hunt et al., (2017)	Hubicha 02	8.84977	39.8324	hot spring
87	Hunt et al., (2017)	Yidi 01	9.06029	39.761	hot spring
88	Hunt et al., (2017)	Kessem 01	9.13712	39.8898	hot spring
89	Hunt et al., (2017)	Filoa 01	9.10721	40.0088	hot spring
90	Hunt et al., (2017)	Habilo sp	9.10587	39.8267	hot spring/mudpool
91	Hunt et al., (2017)	Fentale 01	8.97422	39.9217	fumarole
92	Hunt et al., (2017)	Fentale 02	8.97967	39.9153	fumarole
93	Hunt et al., (2017)	Fentale 03	8.97462	39.911	fumarole
94	Hunt et al., (2017)	Fentale 04	8.98125	39.9018	fumarole
95	Hunt et al., (2017)	Yidi 01	9.07398	39.7693	hot spring
96	Hunt et al., (2017)	Yidi 02	9.07199	39.7722	fumarole
97	Hunt et al., (2017)	Habilo sp	9.11547	39.8229	hot spring/mudpool
98	Hunt et al., (2017)	Kessem 01	9.14512	39.8633	hot spring
99	Hunt et al., (2017)	Didiga 01	9.10229	39.9604	fumarole
100	Hunt et al., (2017)	Filoa 02	9.11558	40.0114	hot spring
101	Hunt et al., (2017)	Hubicha 01	8.85893	39.836	hot spring
102	Hunt et al., (2017)	Hubicha 02	8.85626	39.8349	hot spring
103	Hunt et al., (2017)	Fentale 01	8.97913	39.9191	fumarole
104	Hunt et al., (2017)	Fentale 02	8.98135	39.9097	fumarole
105	Hunt et al., (2017)	Fentale 03	8.98793	39.8988	fumarole
106	Hunt et al., (2017)	Fentale 04	8.98346	39.8991	fumarole
107	Hunt et al., (2017)	Fentale 05	8.97997	39.9082	fumarole
108	Hunt et al., (2017)	Fentale 06	8.98428	39.9093	fumarole
109	Hunt et al., (2017)	Fentale 07	8.98388	39.9225	fumarole
110	Hunt et al., (2017)	Fentale 08	8.99207	39.9128	fumarole
111	Hunt et al., (2017)	Fentale 09	8.99182	39.9022	fumarole
112	Hunt et al., (2017)	Sp 1	9.11333	40.0286	hot spring	43	8,5
113	Hunt et al., (2017)	Sp 2	9.125	40.0453	hot spring	45	8,6
114	Hunt et al., (2017)	Sp 3	9.13944	39.8578	hot spring	48	8,2
115	Hunt et al., (2017)	Sp 4	9.11028	39.8242	hot spring	82	7,5
116	Hunt et al., (2017)	Sp 5	8.85361	39.8611	hot spring	43	8,6
117	Hunt et al., (2017)	Sp 6	8.85361	39.8611	hot spring	43	8,5
118	Hunt et al., (2017)	Hippo pool 1	8.4615	39.194	hot spring	45	8,4
119	Hunt et al., (2017)	Hippo pool 2	8.46217	39.194	hot spring	45	8,4
120	Hunt et al., (2017)	Hippo pool 3	8.46167	39.196	hot spring	45	8,5
121	Hunt et al., (2017)	P. Mebrat Hail	8.40283	39.3892	hot spring	70	7,7
122	Hunt et al., (2017)	M. Alem Tsebel	8.39917	39.3875	hot spring	61	7,7
123	Hunt et al., (2017)	P. n. S. H. comp.	8.399	39.394	hot spring	60	8,0
124	Hunt et al., (2017)	Kid. M. Tsebel	8.39333	39.395	hot spring	48	7,8
125	Hunt et al., (2017)	P. n. S. Res. Off	8.41483	39.3757	hot spring	48	7,9
126	Hunt et al., (2017)	Auto	7.79188	38.7279	fumarole
127	Hunt et al., (2017)	Hulo	7.78076	38.7279	fumarole
128	Hunt et al., (2017)	Oitu Artu	7.74578	38.7742	fumarole
129	Hunt et al., (2017)	Gebiba	7.74308	38.805	fumarole
130	Hunt et al., (2017)	Bobesa	7.78922	38.8195	fumarole
131	Hunt et al., (2017)	Artu Jawe North (AJN)	7.79337	38.7996	fumarole
132	Hunt et al., (2017)	Artu Jawe Middle (AJM)	7.78469	38.7959	fumarole
133	Hunt et al., (2017)	Artu Jawa South (AJS)	7.78052	38.7923	fumarole
134	Hunt et al., (2017)	Adonshe	7.79733	38.7524	fumarole
135	Hunt et al., (2017)	Worbota	7.80909	38.7669	fumarole
136	Hunt et al., (2017)	Finkilo	7.77292	38.7923	fumarole
137	Hunt et al., (2017)	Kore	7.75936	38.7987	fumarole
138	Hunt et al., (2017)	Humo	7.78829	38.7642	fumarole
139	Hunt et al., (2017)	North Bay	7.7105	38.7733	fumarole
140	Hunt et al., (2017)	CF 01	7.22774	38.3464	fumarole
141	Hunt et al., (2017)	CF 02	7.24952	38.3807	fumarole
142	Hunt et al., (2017)	CF 03	7.2519	38.3814	fumarole
143	Hunt et al., (2017)	CF 04	7.25378	38.3815	fumarole
144	Hunt et al., (2017)	CF 05	7.25544	38.3821	fumarole
145	Hunt et al., (2017)	CF 06	7.25592	38.3821	fumarole
146	Hunt et al., (2017)	CF 07	7.27399	38.3866	fumarole
147	Hunt et al., (2017)	CF 08	7.27501	38.3884	fumarole
148	Hunt et al., (2017)	CF 09	7.2778	38.3884	fumarole
149	Hunt et al., (2017)	CF 10	7.27626	38.407	fumarole
150	Hunt et al., (2017)	CF 11	7.19098	38.3724	fumarole
151	Hunt et al., (2017)	CF 12	7.1882	38.3736	fumarole
152	Hunt et al., (2017)	CF 13	7.18564	38.3741	fumarole
153	Hunt et al., (2017)	CF 14	7.18638	38.3758	fumarole
154	Hunt et al., (2017)	CF 15	7.18782	38.3746	fumarole
155	Hunt et al., (2017)	CF 16	7.18898	38.3773	fumarole
156	Hunt et al., (2017)	CF 17	7.18927	38.3762	fumarole
157	Hunt et al., (2017)	CF 18	7.1997	38.3784	fumarole
158	Hunt et al., (2017)	CF 19	7.19965	38.379	fumarole
159	Hunt et al., (2017)	CF 20	7.19907	38.3793	fumarole
160	Hunt et al., (2017)	CF 21	7.18817	38.3862	fumarole
161	Hunt et al., (2017)	CF 22	7.17933	38.3873	fumarole
162	Hunt et al., (2017)	CF 23	7.1805	38.3862	fumarole
163	Hunt et al., (2017)	CF 24	7.18236	38.3868	fumarole
164	Hunt et al., (2017)	CF 25	7.18158	38.3868	fumarole
165	Hunt et al., (2017)	CF 26	7.21525	38.4043	fumarole
166	Hunt et al., (2017)	CF 27	7.21655	38.4035	fumarole
167	Hunt et al., (2017)	CF 28	7.2169	38.4053	fumarole
168	Hunt et al., (2017)	CF 29	7.21677	38.4043	fumarole
169	Hunt et al., (2017)	CF 30	7.21866	38.4421	fumarole
170	Hunt et al., (2017)	CF 31	7.21516	38.4622	fumarole
171	Hunt et al., (2017)	CF 32	7.20593	38.4667	fumarole
172	Hunt et al., (2017)	CF 33	7.18892	38.4488	fumarole
173	Hunt et al., (2017)	CF 34	7.18904	38.4504	fumarole
174	Hunt et al., (2017)	CF 35	7.18882	38.4523	fumarole
175	Hunt et al., (2017)	CF 36	7.18347	38.4509	fumarole
176	Hunt et al., (2017)	CF 37	7.18075	38.4652	fumarole
177	Hunt et al., (2017)	CF 38	7.17663	38.4636	fumarole
178	Hunt et al., (2017)	CF 39	7.17819	38.4242	fumarole
179	Hunt et al., (2017)	ALF 01	7.77986	38.7921	fumarole
180	Hunt et al., (2017)	ALF 02	7.78351	38.7805	fumarole
181	Hunt et al., (2017)	ALF 03	7.7777	38.7821	fumarole
182	Hunt et al., (2017)	ALF 04	7.75694	38.7959	fumarole
183	Hunt et al., (2017)	ALF 05	7.79166	38.8132	fumarole
184	Hunt et al., (2017)	ALF 06	7.7919	38.8159	fumarole
185	Hunt et al., (2017)	ALF 07	7.80722	38.7498	fumarole
186	Hunt et al., (2017)	ALF 08	7.77966	38.73	fumarole
187	Hunt et al., (2017)	ALF 09	7.79062	38.7282	fumarole
188	Hunt et al., (2017)	ALF 10	7.74587	38.7736	fumarole
189	Hunt et al., (2017)	ALF 11	7.74119	38.8034	fumarole
190	Hunt et al., (2017)	ALF 12	7.74432	38.7971	fumarole
191	Hunt et al., (2017)	ALF 13	7.68419	38.7949	fumarole
192	Hunt et al., (2017)	ALS 01	7.45938	38.3886	hot spring
193	Hunt et al., (2017)	ALS 02	7.44475	38.3861	hot spring
194	Hunt et al., (2017)	ALS 03	7.41727	38.4184	hot spring
195	Hunt et al., (2017)	ALS 04	7.41964	38.4224	hot spring
196	Hunt et al., (2017)	ALS 05	7.42181	38.4254	hot spring
197	Hunt et al., (2017)	ALS 06	7.42192	38.4282	hot spring
198	Hunt et al., (2017)	ALS 07	7.4233	38.4357	hot spring
199	Hunt et al., (2017)	ALS 08	7.42121	38.4377	hot spring
200	Hunt et al., (2017)	ALS 09	7.41772	38.4383	hot spring
201	Hunt et al., (2017)	ALS 10	7.4036	38.4242	hot spring
202	Hunt et al., (2017)	ALS 11	7.39991	38.4226	hot spring
203	Hunt et al., (2017)	ALS 12	7.39618	38.5299	hot spring
204	Hunt et al., (2017)	ALS 13	7.39512	38.5234	hot spring
205	Hunt et al., (2017)	ALS 14	7.40651	38.5839	hot spring
206	Hunt et al., (2017)	ALS 15	7.40677	38.5787	hot spring
207	Hunt et al., (2017)	ALS 16	7.45106	38.6258	hot spring
208	Hunt et al., (2017)	ALS 17	7.42793	38.6198	hot spring
209	Hunt et al., (2017)	ALS 18	7.44619	38.6299	hot spring
210	Hunt et al., (2017)	ALS 19	7.46114	38.6373	hot spring
211	Hunt et al., (2017)	ALS 20	7.47168	38.6379	hot spring
212	Hunt et al., (2017)	ALS 21	7.47935	38.6387	hot spring
213	Hunt et al., (2017)	ALS 22	7.47901	38.6375	hot spring
214	Hunt et al., (2017)	ALS 23	7.4827	38.6344	hot spring
215	Hunt et al., (2017)	ALS 24	7.49134	38.631	hot spring
216	Hunt et al., (2017)	ALS 25	7.6635	38.8108	hot spring
217	Hunt et al., (2017)	ALS 26	7.6592	38.8071	hot spring
218	Hunt et al., (2017)	ALS 27	7.67717	38.7957	hot spring
219	Hunt et al., (2017)	ALS 28	7.67581	38.793	hot spring
220	Hunt et al., (2017)	ALS 29	7.66633	38.7851	hot spring
221	Hunt et al., (2017)	ALS 30	7.69187	38.7779	hot spring
222	Hunt et al., (2017)	ALS 31	7.68939	38.776	hot spring
223	Hunt et al., (2017)	ALS 32	7.69212	38.7744	hot spring
224	Hunt et al., (2017)	ALS 33	7.68836	38.7734	hot spring
225	Hunt et al., (2017)	ALS 34	7.70251	38.7917	hot spring
226	Hunt et al., (2017)	ALS 35	7.70993	38.7847	hot spring
227	Hunt et al., (2017)	ALS 36	7.71009	38.7736	hot spring
228	Hunt et al., (2017)	ALS 37	7.7112	38.7722	hot spring
229	Hunt et al., (2017)	ALS 38	7.70994	38.764	hot spring
230	Hunt et al., (2017)	Dobi Spring A	11.8822	41.7376	hot spring
231	Hunt et al., (2017)	Dobi Spring B	11.8936	41.7263	hot spring
232	Hunt et al., (2017)	Dobi Spring D	11.8589	41.8131	hot spring
233	Hunt et al., (2017)	Alalobad Spring 1	11.6511	41.0088	hot spring
234	Hunt et al., (2017)	Alalobad Spring B	11.6511	41.0088	hot spring
235	Hunt et al., (2017)	Alalobad Spring C	11.6511	41.0088	hot spring
236	Hunt et al., (2017)	Alalobad Spring D	11.6511	41.0088	hot spring
237	Hunt et al., (2017)	Alalobad Spring E	11.6511	41.0088	hot spring
238	Hunt et al., (2017)	Alalobad Spring F	11.6511	41.0088	hot spring
239	Hunt et al., (2017)	Alalobad Spring G	11.6511	41.0088	hot spring
240	Hunt et al., (2017)	Chirete Spring	10.6009	39.9164	hot spring
241	Hunt et al., (2017)	Harbu Spring A	10.92	39.7847	hot spring
242	Hunt et al., (2017)	Harbu Spring B	10.92	39.7847	hot spring
243	Hunt et al., (2017)	Awayetu Spring 1, Senbete	10.3271	40.0092	hot spring
244	Hunt et al., (2017)	Awayetu Spring 4, Senbete	10.3271	40.0092	hot spring
245	Hunt et al., (2017)	Abune Aregawi Spring, S. Robit	9.99061	39.8713	hot spring
246	Hunt et al., (2017)	Ebdu Spring, Shewa Robit	9.99963	39.8782	hot spring
247	Hunt et al., (2017)	Abaya S.15	6.80389	38.0878	hot spring
248	Hunt et al., (2017)	Abaya S.16	6.80389	38.0878	hot spring
249	Hunt et al., (2017)	Abaya S.6	6.81056	38.1611	hot spring
250	Hunt et al., (2017)	Abaya S.8	6.81056	38.0944	hot spring
251	Hunt et al., (2017)	Bilale Camp S	6.80389	38.0944	hot spring
252	Hunt et al., (2017)	BiI.Tob.Mon.S	6.81056	38.1611	hot spring
253	Hunt et al., (2017)	Tena Bilate S.	6.80389	38.0944	hot spring
254	Hunt et al., (2017)	Gidabo S.28	6.61	38.09	hot spring
255	Hunt et al., (2017)	Shalla S.52	7.43	38.62	hot spring
256	Hunt et al., (2017)	Shalla Spring	7.44	38.62	hot spring
257	Hunt et al., (2017)	Bodicho S.46	6.70389	38.045	hot spring
258	Hunt et al., (2017)	Shalla S.90	7.42	38.63	hot spring
259	Hunt et al., (2017)	Shalla S.91	7.43	38.63	hot spring
260	Hunt et al., (2017)	Langano S.1	7.74	38.79	hot spring
261	Hunt et al., (2017)	Chitu S.65	7.4	38.42	hot spring
262	Hunt et al., (2017)	Sodore S.4	8.40972	39.3903	hot spring
263	Hunt et al., (2017)	Sodore S.5	8.4	39.4028	hot spring
264	Hunt et al., (2017)	Dofan 1 Hot spring	9.34	40.12	hot spring
265	Hunt et al., (2017)	Dofan 2	9.32	40.07	hot spring
266	Hunt et al., (2017)	Dofan 3	9.3	40.08	hot spring
267	Hunt et al., (2017)	Fantale 1	8.93	39.9	hot spring
268	Hunt et al., (2017)	Fantale 2	8.94	39.86	hot spring
269	Hunt et al., (2017)	Hippo Pool sp1	8.46917	39.2011	hot spring
270	Hunt et al., (2017)	Hippo Pool sp2	8.46931	39.2031	hot spring
271	Hunt et al., (2017)	Hippo pool sp3	8.46944	39.205	hot spring
272	Hunt et al., (2017)	Meteka hotspring 1	10	40.5	hot spring
273	Hunt et al., (2017)	Meteka hotspring 2	10	40.5	hot spring
274	Hunt et al., (2017)	Meteka hotspring 3	10	40.5	hot spring
275	Hunt et al., (2017)	02GERGE. 1	8.46917	39.2011	hot spring
276	Hunt et al., (2017)	03GERGE. 3	8.46944	39.205	hot spring
277	Hunt et al., (2017)	04AWASH RI	8.45778	39.2419	hot spring
278	Hunt et al., (2017)	05WONGI GE	8.46944	39.205	hot spring
279	Hunt et al., (2017)	12S0DERE 1	8.40472	39.39	hot spring
280	Hunt et al., (2017)	13S0DERE 2	8.40972	39.3903	hot spring
281	Hunt et al., (2017)	14S0DERE 3	8.4	39.4028	hot spring
282	Hunt et al., (2017)	15ABADIR 4	8.41917	39.3817	hot spring
283	Hunt et al., (2017)	32WONGI GE	8.46944	39.205	hot spring
284	Hunt et al., (2017)	Werdi HF	8.19813	39.081	warm ground/fumaroles
285	Hunt et al., (2017)	TM HF 02	8.17609	39.1003	warm ground/fumaroles
286	Hunt et al., (2017)	TM HF 03	8.16702	39.1072	warm ground/fumaroles
287	Hunt et al., (2017)	TM HF 04	8.15885	39.1072	warm ground/fumaroles
288	Hunt et al., (2017)	TM HF 05	8.1519	39.1143	warm ground/fumaroles
289	Hunt et al., (2017)	TM HF 06	8.14641	39.1345	warm ground/fumaroles
290	Hunt et al., (2017)	TM HF 07	8.15739	39.069	warm ground/fumaroles
291	Hunt et al., (2017)	TM HF 08	8.16802	39.0558	warm ground/fumaroles
292	Hunt et al., (2017)	TM HF 09	8.18261	39.0365	warm ground/fumaroles
293	Hunt et al., (2017)	TM HF 10	8.22994	39.0737	warm ground/fumaroles
294	Hunt et al., (2017)	TM HF 11	8.20453	39.0311	warm ground/fumaroles
295	Hunt et al., (2017)	TM HF 12	8.27034	39.095	warm ground/fumaroles
296	Hunt et al., (2017)	TM HF 13	8.27673	39.0302	warm ground/fumaroles
297	Hunt et al., (2017)	TM HF 14	8.24609	39.1604	warm ground/fumaroles
298	Hunt et al., (2017)	Shago Tsebel	8.00041	38.3904	hot spring
299	Hunt et al., (2017)	Ajera	7.96611	38.404	hot spring
300	Hunt et al., (2017)	Abushek Tsebel	7.97106	38.3892	hot spring
301	Hunt et al., (2017)	Hubicha 1	8.852	39.8335	hot spring	43	8,4
302	Hunt et al., (2017)	Hubicha 2	8.852	39.8335	hot spring	42	8,5
303	Hunt et al., (2017)	Filwoha 1	9.10517	40.019	hot spring	44	8,3
304	Hunt et al., (2017)	Filwoha 2	9.10567	40.019	hot spring	43	8,3
305	Hunt et al., (2017)	Ayelu	9.97183	40.538	hot spring	49	8,4
306	Hunt et al., (2017)	Bulga 1	9.13967	39.8555	hot spring	48	7,6
307	Hunt et al., (2017)	Bulga 2	9.14217	39.884	hot spring	52	8,0
308	Hunt et al., (2017)	Hippo pool	8.45533	39.1883	hot spring	43	8,2
309	Hunt et al., (2017)	Sodere 1	8.40117	39.3858	hot spring	67	6,8
310	Hunt et al., (2017)	Sodere 2	8.40083	39.3877	hot spring	51	7,1
311	Hunt et al., (2017)	Langano 1	7.7055	38.7565	hot spring	61	7,6
312	Hunt et al., (2017)	Langano 2	7.67317	38.79	hot spring	82	8,3
313	Hunt et al., (2017)	KVC 01	8.78551	39.7086	fumarole
314	Hunt et al., (2017)	Hubitcha 1	8.852	39.8335	hot spring		8,3
315	Hunt et al., (2017)	Filoa sp 2	9.108	40.0238	hot spring	44	8,5
316	Hunt et al., (2017)	Filoa sp 3	9.12167	40.0405	hot spring	43	8,5
317	Hunt et al., (2017)	Dofan sp1	9.40083	40.0908	hot spring	51	8,5
318	Hunt et al., (2017)	HF 01	9.11589	39.8254	fumarole
319	Hunt et al., (2017)	HF 02	9.11801	39.8265	fumarole
320	Hunt et al., (2017)	HF 03	9.12021	39.8277	fumarole
321	Hunt et al., (2017)	HF 04	9.12102	39.8281	fumarole
322	Hunt et al., (2017)		6.60744	37.9267	hot spring
323	Hunt et al., (2017)		6.61695	37.9513	hot spring
324	Hunt et al., (2017)		6.65746	37.9771	hot spring
325	Hunt et al., (2017)		6.67173	37.9887	hot spring
326	Hunt et al., (2017)		6.77623	38.0629	hot spring
327	Hunt et al., (2017)		6.85625	38.086	hot spring
328	Hunt et al., (2017)		6.92436	38.0833	hot spring
329	Hunt et al., (2017)		7.29053	38.0114	hot spring
330	Hunt et al., (2017)		6.59682	37.9276	hot spring
331	Hunt et al., (2017)		6.62503	37.9375	hot spring
332	Hunt et al., (2017)		6.62024	37.9359	hot spring
333	Hunt et al., (2017)		6.62911	37.9394	hot spring
334	Hunt et al., (2017)		7.31711	38.0022	hot spring
335	Hunt et al., (2017)		7.11967	37.9627	hot spring
336	Hunt et al., (2017)		6.56667	37.8253	hot spring
337	Hunt et al., (2017)		7.03439	38.5481	hot spring
338	Hunt et al., (2017)		7.02351	38.5555	hot spring
339	Hunt et al., (2017)		7.02207	38.5552	hot spring
340	Hunt et al., (2017)		7.11185	38.5615	hot spring
341	Hunt et al., (2017)		7.10087	38.6184	hot spring
342	Hunt et al., (2017)		7.10456	38.6349	hot spring
343	Hunt et al., (2017)		6.98796	38.5371	hot spring
344	Hunt et al., (2017)		7.08306	38.6462	hot spring
345	Hunt et al., (2017)		7.06113	38.6575	hot spring
346	Hunt et al., (2017)		7.08437	38.6158	hot spring
347	Hunt et al., (2017)		7.10485	38.5744	hot spring
348	Hunt et al., (2017)		7.89885	38.8545	hot spring
349	Hunt et al., (2017)		7.92396	38.8503	hot spring
350	Hunt et al., (2017)		8.48802	39.2736	hot spring
351	Hunt et al., (2017)		8.56203	39.4868	hot spring
352	Hunt et al., (2017)		8.64497	39.4763	hot spring
353	Hunt et al., (2017)	NEF 01	9.01773	39.9345	fumarole
354	Hunt et al., (2017)	NEF 02	9.02318	39.9281	fumarole
355	Hunt et al., (2017)	Fil 01	9.11743	39.9906	hot spring
356	Hunt et al., (2017)	Fil 02	9.12082	39.9957	hot spring
357	ELC (1986)		8.17366	39.0486	fumarole
358	ELC (1986)		8.18122	39.0594	fumarole
359	ELC (1986)		8.19398	39.0877	fumarole
360	ELC (1986)		8.19952	39.0856	fumarole
361	ELC (1986)		8.20611	39.0766	fumarole
362	ELC (1986)		8.16434	39.1315	fumarole
363	ELC (1986)		8.16726	39.139	fumarole
364	ELC (1986)		8.16633	39.1705	fumarole
365	ELC (1986)		8.16716	39.1873	fumarole
366	ELC (1986)		8.28393	38.987	fumarole
367	ELC (1986)		8.29722	39.03	fumarole
368	ELC (1986)		8.28424	39.0682	fumarole
369	ELC (1986)		8.2986	39.0853	fumarole
370	ELC (1986)		8.30436	39.0915	fumarole
371	ELC (1986)		8.27605	39.0367	fumarole
372	ELC (1986)		8.27124	39.0132	fumarole
373	ELC (1986)		8.31538	39.0468	fumarole
374	ELC (1986)		8.31792	39.168	fumarole
375	ELC (1986)		8.33322	39.1559	fumarole
376	ELC (1986)		8.37201	39.1534	fumarole
377	ELC (1986)		8.46126	39.1926	warm spring
378	ELC (1986)		8.46917	39.19	warm spring
379	ELC (1986)		8.4703	39.1867	warm spring
380	ELC (1986)		8.47154	39.1835	warm spring
381	ELC (1986)		8.36744	38.9983	warm spring
382	ELC (1986)		8.41309	39.3179	warm spring
383	ELC (1986)		8.45718	39.2872	fumarole
384	ELC (1986)		8.47149	39.3001	fumarole
385	ELC (1986)		8.47952	39.2918	fumarole
386	ELC (1986)		8.48086	39.2986	fumarole
387	ELC (1986)		8.48343	39.278	fumarole
388	ELC (1986)		8.48685	39.2832	fumarole
389	ELC (1986)		8.49088	39.2973	fumarole
390	ELC (1986)		8.48688	39.3194	fumarole
391	ELC (1986)		8.51996	39.4753	fumarole
392	ELC (1986)		8.51004	39.4704	fumarole
393	ELC (1986)		8.61176	39.4122	warm spring
394	ELC (1986)		8.61624	39.5102	fumarole
395	ELC (1986)		8.6159	39.5131	fumarole
396	ELC (1986)		8.66336	39.5066	fumarole
397	ELC (1986)		8.7647	39.6536	fumarole
398	ELC (1986)		8.98809	39.8968	fumarole
399	ELC (1986)		8.98996	39.9027	fumarole
400	ELC (1986)		8.99023	39.9064	fumarole
401	ELC (1986)		8.98531	39.9127	fumarole
402	ELC (1986)		8.98131	39.9107	fumarole
403	ELC (1986)		8.97922	39.9142	fumarole
404	ELC (1986)		9.06742	39.7982	fumarole
405	ELC (1986)		9.06792	39.7948	warm spring
406	ELC (1986)		9.1093	40.0201	warm spring
407	ELC (1986)		9.10889	40.0137	warm spring
408	ELC (1986)		9.11584	40.0221	warm spring
409	ELC (1986)		8.23408	39.0987	fumarole
410	ELC (1986)		8.24321	39.1001	fumarole
411	ELC (1986)		8.86556	39.8623	warm spring
412	ELC (1986)		8.88951	39.8631	warm spring
413	ELC (1986)		8.89521	39.8649	warm spring
414	ELC (1986)		9.25731	40.0802	fumarole
415	ELC (1986)		9.26068	40.0682	warm spring
416	ELC (1986)		9.32614	40.0705	warm spring
417	ELC (1986)		9.36222	40.1164	warm spring
418	ELC (1986)		9.36163	40.1179	warm spring
419	ELC (1986)		9.36385	40.118	warm spring
420	ELC (1986)		9.36335	40.12	warm spring
421	ELC (1986)		9.37139	40.1543	warm spring
422	ELC (1986)		9.3883	40.1385	warm spring
423	ELC (1986)		9.372	40.0982	warm spring
424	ELC (1986)		9.34417	40.0958	fumarole
425	ELC (1986)		9.38389	40.1288	fumarole
426	ELC (1986)		9.9058	40.4064	warm spring
427	ELC (1986)		9.91374	40.4095	warm spring
428	ELC (1986)		9.86297	40.5154	warm spring
429	ELC (1986)		9.95668	40.5316	warm spring
430	ELC (1986)		9.96107	40.5327	warm spring
431	ELC (1986)		9.96591	40.5344	warm spring
432	ELC (1986)		9.97042	40.5365	warm spring
433	ELC (1986)		9.97514	40.5383	warm spring
434	ELC (1986)		9.97953	40.5397	warm spring
435	ELC (1986)		10.0601	40.8287	warm spring
436	ELC (1986)		10.0656	40.8188	warm spring
437	UNDP (1973)	Filoa hot spring	9.11614	40.0553	hot spring
438	UNDP (1973)	Bilen springs	9.49485	40.3151	hot spring
439	UNDP (1973)	Bilen springs	9.47775	40.3118	hot spring
440	UNDP (1973)	Dofan	9.36278	40.118	fumarole
441	UNDP (1973)	Hertale springs	9.91247	40.4136	hot spring
442	UNDP (1973)	Hertale Springs	9.88372	40.3834	hot spring
443	UNDP (1973)	Amoissa fumarole	10.0725	40.7974	fumarole
444	UNDP (1973)	Amoissa volcano	10.1028	40.7469	fumarole
445	UNDP (1973)	Allollobeda	11.6963	40.9645	fumarole
446	UNDP (1973)	Allollobeda	11.6712	40.9773	fumarole
447	UNDP (1973)	Allollobeda	11.6494	40.9797	fumarole
448	UNDP (1973)	Allollobeda	11.6313	40.9544	fumarole
449	UNDP (1973)	Allollobeda	11.6044	41.0016	fumarole
450	UNDP (1973)	Allollobeda	11.5746	40.9618	fumarole
451	UNDP (1973)	Allollobeda	11.5579	40.9574	fumarole
452	UNDP (1973)	Allollobeda	11.4564	40.9572	fumarole
453	UNDP (1973)	Allollobeda	11.4343	40.9572	fumarole
454	UNDP (1973)	Allollobeda	11.4152	40.9526	fumarole
455	UNDP (1973)	Allollobeda	11.4357	41.0237	fumarole
456	UNDP (1973)	Lake Abaja region	7.92959	38.883	hot spring
457	UNDP (1973)	Lake Abaja region	6.61676	37.913	hot spring
458	UNDP (1973)		7.11318	38.6311	hot spring
459	UNDP (1973)	Corbetti caldera	7.203	38.381	fumarole
460	UNDP (1973)	Corbetti caldera	7.22242	38.4008	fumarole
461	UNDP (1973)	Corbetti caldera	7.19116	38.4524	fumarole
462	UNDP (1973)	Corbetti caldera	7.18045	38.4665	fumarole
463	UNDP (1973)	Corbetti caldera	7.20539	38.465	fumarole
464	UNDP (1973)	Corbetti caldera	7.21002	38.4702	fumarole
465	UNDP (1973)	Corbetti caldera	7.21059	38.4637	fumarole
466	UNDP (1973)	Corbetti caldera	7.19824	38.3776	fumarole
467	UNDP (1973)	Lake Shalla	7.48937	38.6294	hot spring
468	UNDP (1973)	Lake Shalla	7.48294	38.6334	hot spring
469	UNDP (1973)	Lake Shalla	7.47978	38.6329	hot spring
470	UNDP (1973)	Lake Shalla	7.47399	38.6354	hot spring
471	UNDP (1973)	Lake Shalla	7.4719	38.6357	hot spring
472	UNDP (1973)	Lake Shalla	7.46853	38.637	hot spring
473	UNDP (1973)	Lake Shalla	7.45874	38.6354	hot spring
474	UNDP (1973)	Lake Shalla	7.44718	38.6244	hot spring
475	UNDP (1973)	Lake Shalla	7.44423	38.6269	hot spring
476	UNDP (1973)	Lake Shalla	7.39427	38.5647	hot spring
477	UNDP (1973)	Lake Shalla	7.3914	38.5591	hot spring
478	UNDP (1973)	Lake Shalla	7.4179	38.4416	hot spring
479	UNDP (1973)	Lake Shalla	7.42026	38.4362	hot spring
480	UNDP (1973)	Lake Shalla	7.41646	38.4241	hot spring
481	UNDP (1973)	Lake Shalla	7.41435	38.4221	hot spring
482	UNDP (1973)	Lake Shalla	7.41148	38.4192	hot spring
483	UNDP (1973)	Lake Shalla	7.40904	38.4179	hot spring
484	UNDP (1973)		7.30717	38.479	fumarole
485	UNDP (1973)	Alutu Volcano	7.68506	38.7948	fumarole
486	UNDP (1973)	Alutu Volcano	7.68765	38.7962	fumarole
487	UNDP (1973)	Alutu Volcano	7.69033	38.7972	fumarole
488	UNDP (1973)	Alutu Volcano	7.6893	38.7735	hot spring
489	UNDP (1973)	Alutu Volcano	7.69168	38.7743	hot spring
490	UNDP (1973)	Alutu Volcano	7.71147	38.7751	hot spring
491	UNDP (1973)	Alutu Volcano	7.71372	38.7746	hot spring
492	UNDP (1973)	Alutu Volcano	7.70885	38.7815	hot spring
493	UNDP (1973)	Alutu Volcano	7.66656	38.822	hot spring
494	UNDP (1973)	Alutu Volcano	7.74365	38.8033	fumarole
495	UNDP (1973)	Alutu Volcano	7.75541	38.8007	fumarole
496	UNDP (1973)	Alutu Volcano	7.7447	38.7749	fumarole
497	UNDP (1973)	Alutu Volcano	7.7603	38.7951	fumarole
498	UNDP (1973)	Alutu Volcano	7.7765	38.7879	fumarole
499	UNDP (1973)	Alutu Volcano	7.77888	38.7957	fumarole
500	UNDP (1973)	Alutu Volcano	7.78953	38.824	fumarole
501	UNDP (1973)	Alutu Volcano	7.77824	38.7224	fumarole
502	UNDP (1973)	Alutu Volcano	7.78742	38.7204	fumarole
503	UNDP (1973)		11.8887	41.0867	fumarole
504	UNDP (1973)		11.9088	41.0851	fumarole
505	UNDP (1973)		11.9136	41.0552	fumarole
506	UNDP (1973)		11.5411	40.9681	fumarole
507	UNDP (1973)		11.5512	40.9776	fumarole
508	UNDP (1973)		11.5602	40.984	fumarole
509	UNDP (1973)	Saha hot spring	12.0516	41.0823	hot spring
510	UNDP (1973)	Bagaadoloma Crater lake	11.9684	40.9502	fumarole
511	UNDP (1973)		11.7913	41.1188	hot spring
512	UNDP (1973)	Allalobeda	11.6488	40.9965	hot spring
513	UNDP (1973)	Damahale crater	11.2612	41.6444	fumarole
514	UNDP (1973)	Lake Abbe	11.0883	41.6638	hot spring
515	UNDP (1973)	Lake Abbe	11.0821	41.6155	hot spring
516	UNDP (1973)	Dobi gabren hot spring	11.8704	41.7392	hot spring
517	UNDP (1973)	Dobi grabren hot spring	11.9462	41.6162	hot spring
518	UNDP (1973)	Dobi grabren hot spring	11.9698	41.6064	hot spring
519	UNDP (1973)	Dobi grabren hot spring	12.12	41.4645	hot spring
